# Supplementary material for: Genomics-enabled analysis of the emergent disease cotton bacterial blight
Source: PLoS Genet. 2017 Sep 14;13(9):e1007003. doi: 10.1371/journal.pgen.1007003 (PMC5614658; doi:10.1371/journal.pgen.1007003)
Supplement: S4 Table — (XLSX) [file pgen.1007003.s004.xlsx]

## Sheet: Sheet1
A Genome	D Genome	Gene Annotation
Gh_A02G0615	Gh_D02G0670	Seven transmembrane MLO family protein
Gh_A03G0560	Gh_D03G0971	Pectate lyase family protein
Gh_A05G2012	Gh_D05G2256	Protein of unknown function DUF688
Gh_A06G0439	Gh_D06G0479	basic chitinase
Gh_A07G1129	Gh_D07G1229	Protein of unknown function (DUF1278)
Gh_A10G0257	Gh_D10G0257	Protein E6
Gh_A10G1075	Gh_D10G1437	Pectin lyase-like superfamily protein
Gh_A13G1467	Gh_D13G1816	pathogenesis-related 4
Gh_A01G0779		Predicted Protein
Gh_A01G1712		terpene synthase 21
Gh_A02G0972		glycosyl hydrolase 9B13
Gh_A03G0875		Protein of unknown function (DUF1666)
Gh_A04G0364		Cysteine proteinases superfamily protein
Gh_A04G0366		Cysteine proteinases superfamily protein
Gh_A05G1967		Predicted Protein
Gh_A07G0470		malate synthase
Gh_A08G1167		downstream target of AGL15 2
Gh_A09G0128		EXS (ERD1/XPR1/SYG1) family protein
Gh_A09G1148		Protein of unknown function, DUF642
Gh_A09G1803		Pectin lyase-like superfamily protein
Gh_A12G2323		PAR1 protein
Gh_A13G0185		expansin A4
Gh_A13G0205		Ypt/Rab-GAP domain of gyp1p superfamily protein
Gh_A13G0281		Subtilase family protein
Gh_A13G1662		Protein of unknown function (DUF1677)
	Gh_D01G1158	hydroxy methylglutaryl CoA reductase 1
	Gh_D02G1352	glutaredoxin-related
	Gh_D02G1437	Plant invertase/pectin methylesterase inhibitor superfamily protein
	Gh_D03G1462	osmotin 34
	Gh_D05G2589	laccase 14
	Gh_D06G0662	Nucleotide-diphospho-sugar transferases superfamily protein
	Gh_D07G1960	Uncharacterized membrane protein
	Gh_D07G1997	RAB GTPase homolog A5E
	Gh_D08G0336	WUSCHEL related homeobox 13
	Gh_D08G2134	Protein of unknown function (DUF1635)
	Gh_D09G1130	beta-1,3-glucanase 3
	Gh_D10G1861	expansin A8
	Gh_D11G0279	chloroplast beta-amylase
	Gh_D11G1628	reversibly glycosylated polypeptide 1
	Gh_D12G2309	glycosyl hydrolase 9C2
Gh_Sca005130G01		photosystem II reaction center protein B
Gh_Sca005423G01		Leucine-rich receptor-like protein kinase family protein
Gh_Sca006797G01		TBP-ASSOCIATED FACTOR 6B
